# Supplementary material for: Sensitivity of aerosol and cloud properties to coupling strength of marine boundary layer clouds over the northwest Atlantic
Source: Copernicus journal article supplement (doi:10.5194/acp-25-2407-2025), 2025-02-25
Supplement: Supplementary file 1 [file acp-25-2407-2025-supplement.pdf]

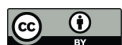

*Supplement of*

## **Sensitivity of aerosol and cloud properties to coupling strength of marine boundary layer clouds over the northwest Atlantic**

**Kira Zeider et al.**

*Correspondence to:* Armin Sorooshian ([armin@arizona.edu](mailto:armin@arizona.edu))

The copyright of individual parts of the supplement might differ from the article licence.

**Table S1.** Sensitivity test results for aerosol and other atmospheric properties investigated across the MinAlt-BCB pairs.  $\Delta q_t$  and  $\Delta\theta_\ell$  (left/right) were varied (the original criteria are reported in the first column) and the column headers are interpreted as such: for the 0.6/1.0 column, strong coupling is for  $\Delta\theta_\ell \leq 1.0$  K and  $\Delta q_t \leq 0.6$  g kg<sup>-1</sup>; moderate coupling with high  $\Delta\theta_\ell$  is for  $\Delta\theta_\ell > 1.0$  K and  $\Delta q_t \leq 0.6$  g kg<sup>-1</sup>; moderate coupling with high  $\Delta q_t$  is for  $\Delta\theta_\ell \leq 1.0$  K and  $\Delta q_t > 0.6$  g kg<sup>-1</sup>; and weak coupling is for  $\Delta\theta_\ell > 1.0$  K and  $\Delta q_t > 0.6$  g kg<sup>-1</sup>. Flight data for MinAlt-BCB pairs were grouped based on the new criteria, and the values reported are the means of the grouped data for each coupling regime. The  $\Delta$  calculation refers to the MinAlt value minus the BCB value.

|                                             | 0.8/1.0 | 0.6/1.0 | 0.7/1.0 | 0.9/1.0 | 1.0/1.0 | 1.0/1.2 | 0.8/0.8 | 0.8/0.9 | 0.8/1.1 | 0.8/1.2 | 0.6/0.8 | 0.5/0.5 |
|---------------------------------------------|---------|---------|---------|---------|---------|---------|---------|---------|---------|---------|---------|---------|
| <b># points</b>                             |         |         |         |         |         |         |         |         |         |         |         |         |
| Strong coupling                             | 293     | 274     | 286     | 302     | 310     | 320     | 287     | 289     | 297     | 303     | 268     | 210     |
| Moderate coupling, high $\Delta\theta_\ell$ | 56      | 53      | 56      | 57      | 57      | 47      | 62      | 60      | 52      | 46      | 59      | 92      |
| Moderate coupling, high $\Delta q_t$        | 42      | 61      | 49      | 33      | 25      | 27      | 35      | 38      | 42      | 44      | 54      | 63      |
| Weak coupling                               | 20      | 23      | 20      | 19      | 19      | 17      | 27      | 24      | 20      | 18      | 30      | 46      |
| <b><math>\Delta\text{scat}</math></b>       |         |         |         |         |         |         |         |         |         |         |         |         |
| Strong coupling                             | 2.2     | 1.9     | 2.2     | 2.2     | 2.2     | 2.2     | 2.2     | 2.2     | 2.2     | 2.2     | 2.2     | 2.2     |
| Moderate coupling, high $\Delta\theta_\ell$ | 3.5     | 3.5     | 3.4     | 3.4     | 3.4     | 3.9     | 3.3     | 3.3     | 3.7     | 3.9     | 3.4     | 3.0     |
| Moderate coupling, high $\Delta q_t$        | 2.4     | 2.5     | 2.5     | 2.4     | 2.7     | 2.8     | 2.6     | 2.5     | 2.4     | 2.5     | 2.6     | 2.1     |
| Weak coupling                               | 3.5     | 3.3     | 3.5     | 3.5     | 3.5     | 3.4     | 3.0     | 3.2     | 3.5     | 3.4     | 2.9     | 3.1     |
| <b><math>\Delta\text{IntV}</math></b>       |         |         |         |         |         |         |         |         |         |         |         |         |
| Strong coupling                             | 2.5     | 1.5     | 2.5     | 2.5     | 2.5     | 2.4     | 2.5     | 2.5     | 2.5     | 2.5     | 2.4     | 2.5     |
| Moderate coupling, high $\Delta\theta_\ell$ | 2.1     | 2.1     | 2.1     | 2.2     | 2.2     | 2.3     | 2.2     | 2.2     | 2.2     | 2.2     | 2.2     | 2.1     |
| Moderate coupling, high $\Delta q_t$        | 1.9     | 2.5     | 2.1     | 1.9     | 2.3     | 2.3     | 1.8     | 1.8     | 1.9     | 1.9     | 2.6     | 2.5     |
| Weak coupling                               | 2.8     | 2.8     | 2.8     | 2.6     | 2.6     | 2.6     | 2.6     | 2.7     | 2.8     | 2.9     | 2.6     | 2.8     |
| <b><math>\Delta N_{a&gt;3\mu m}</math></b>  |         |         |         |         |         |         |         |         |         |         |         |         |
| Strong coupling                             | 0.32    | 0.20    | 0.32    | 0.31    | 0.31    | 0.30    | 0.32    | 0.32    | 0.32    | 0.31    | 0.33    | 0.35    |
| Moderate coupling, high $\Delta\theta_\ell$ | 0.33    | 0.35    | 0.33    | 0.32    | 0.32    | 0.37    | 0.32    | 0.32    | 0.34    | 0.38    | 0.34    | 0.29    |

|                                             |       |       |       |       |       |       |       |       |       |       |       |       |
|---------------------------------------------|-------|-------|-------|-------|-------|-------|-------|-------|-------|-------|-------|-------|
| Moderate coupling,<br>high $\Delta q_t$     | 0.15  | 0.15  | 0.15  | 0.16  | 0.15  | 0.15  | 0.15  | 0.15  | 0.15  | 0.15  | 0.16  | 0.22  |
| Weak coupling                               | 0.53  | 0.45  | 0.53  | 0.57  | 0.57  | 0.60  | 0.41  | 0.46  | 0.53  | 0.56  | 0.36  | 0.31  |
| <b>N<sub>d</sub></b>                        |       |       |       |       |       |       |       |       |       |       |       |       |
| Strong coupling                             | 344   | 366   | 346   | 344   | 348   | 348   | 345   | 345   | 343   | 343   | 351   | 356   |
| Moderate coupling,<br>high $\Delta\theta_t$ | 419   | 422   | 421   | 419   | 419   | 439   | 411   | 412   | 432   | 441   | 412   | 376   |
| Moderate coupling,<br>high $\Delta q_t$     | 329   | 318   | 334   | 343   | 294   | 285   | 373   | 362   | 345   | 336   | 767   | 371   |
| Weak coupling                               | 275   | 279   | 275   | 270   | 270   | 280   | 263   | 267   | 275   | 286   | 267   | 254   |
| <b>MinAlt <math>\sigma_w</math></b>         |       |       |       |       |       |       |       |       |       |       |       |       |
| Strong coupling                             | 0.86  | 1.17  | 0.87  | 0.86  | 0.86  | 0.86  | 0.85  | 0.85  | 0.86  | 0.86  | 0.86  | 0.85  |
| Moderate coupling,<br>high $\Delta\theta_t$ | 1.00  | 1.00  | 0.99  | 0.99  | 0.99  | 0.97  | 1.01  | 1.02  | 0.96  | 0.97  | 1.02  | 0.97  |
| Moderate coupling,<br>high $\Delta q_t$     | 0.81  | 0.78  | 0.77  | 0.73  | 0.79  | 0.79  | 0.84  | 0.84  | 0.81  | 0.80  | 0.80  | 0.86  |
| Weak coupling                               | 0.49  | 0.58  | 0.55  | 0.52  | 0.52  | 0.50  | 0.57  | 0.53  | 0.55  | 0.53  | 0.60  | 0.63  |
| <b>BCB <math>\sigma_w</math></b>            |       |       |       |       |       |       |       |       |       |       |       |       |
| Strong coupling                             | 0.70  | 0.86  | 0.71  | 0.70  | 0.69  | 0.70  | 0.71  | 0.71  | 0.70  | 0.71  | 0.72  | 0.71  |
| Moderate coupling,<br>high $\Delta\theta_t$ | 0.64  | 0.68  | 0.64  | 0.65  | 0.65  | 0.62  | 0.64  | 0.64  | 0.64  | 0.61  | 0.67  | 0.67  |
| Moderate coupling,<br>high $\Delta q_t$     | 0.81  | 0.72  | 0.75  | 0.83  | 0.99  | 0.97  | 0.79  | 0.82  | 0.81  | 0.81  | 0.70  | 0.67  |
| Weak coupling                               | 0.49  | 0.44  | 0.49  | 0.48  | 0.48  | 0.45  | 0.60  | 0.54  | 0.49  | 0.47  | 0.55  | 0.72  |
| <b>BCB - MinAlt <math>\sigma_w</math></b>   |       |       |       |       |       |       |       |       |       |       |       |       |
| Strong coupling                             | -0.15 | -0.31 | -0.15 | -0.16 | -0.16 | -0.17 | -0.15 | -0.14 | -0.16 | -0.16 | -0.14 | -0.15 |
| Moderate coupling,<br>high $\Delta\theta_t$ | -0.34 | -0.32 | -0.35 | -0.34 | -0.34 | -0.36 | -0.37 | -0.38 | -0.33 | -0.36 | -0.35 | -0.30 |
| Moderate coupling,<br>high $\Delta q_t$     | 0.01  | -0.06 | -0.02 | 0.10  | 0.20  | 0.19  | -0.04 | -0.03 | 0.01  | 0.01  | -0.10 | -0.19 |
| Weak coupling                               | -0.05 | -0.14 | -0.05 | -0.05 | -0.05 | -0.05 | 0.03  | 0.01  | -0.05 | -0.06 | -0.05 | 0.09  |

**Table S2.** Statistics for aerosol and other atmospheric properties investigated across the MinAlt-BCB pairs ( $\Delta$  calculation refers to the MinAlt value minus the BCB value) for the summer flights, except for MinAlt  $\sigma_w$  and BCB  $\sigma_w$ , which are the average  $\sigma_w$  for each respective leg. Each property is broken down into the different degrees of coupling (n = number of points used in each coupling category).

| Parameter               | Degree of Coupling                 | Mean  | Standard Deviation | Min   | 25%   | 50%   | 75%  | Max  | n   |
|-------------------------|------------------------------------|-------|--------------------|-------|-------|-------|------|------|-----|
| $\Delta_{scat}$         | Strong                             | 2.6   | 2.6                | 0.02  | 0.75  | 1.8   | 3.3  | 13.9 | 106 |
|                         | Moderate, high $\Delta\theta_\ell$ | 4.0   | 3.8                | 0.08  | 1.4   | 3.3   | 5.9  | 13.3 | 12  |
|                         | Moderate, high $\Delta q_t$        | 2.3   | 2.2                | 0.42  | 0.80  | 1.5   | 3.4  | 9.2  | 16  |
|                         | Weak                               | 3.8   | 3.7                | 0.01  | 0.18  | 3.0   | 7.7  | 10.8 | 11  |
| $\Delta_{IntV}$         | Strong                             | 3.0   | 2.7                | 0.02  | 1.2   | 2.0   | 4.0  | 13.6 | 115 |
|                         | Moderate, high $\Delta\theta_\ell$ | 3.2   | 3.0                | 0.38  | 0.75  | 2.2   | 5.8  | 9.3  | 12  |
|                         | Moderate, high $\Delta q_t$        | 1.6   | 1.6                | 0.01  | 0.17  | 1.0   | 3.4  | 4.3  | 17  |
|                         | Weak                               | 2.7   | 2.0                | 0.18  | 1.1   | 2.5   | 4.2  | 5.8  | 11  |
| $\Delta N_{>3\mu m}$    | Strong                             | 0.47  | 0.55               | 0.00  | 0.10  | 0.32  | 0.61 | 3.3  | 115 |
|                         | Moderate, high $\Delta\theta_\ell$ | 0.42  | 0.33               | 0.00  | 0.12  | 0.41  | 0.68 | 1.1  | 12  |
|                         | Moderate, high $\Delta q_t$        | 0.20  | 0.18               | 0.02  | 0.05  | 0.12  | 0.30 | 0.61 | 17  |
|                         | Weak                               | 0.14  | 0.14               | 0.02  | 0.04  | 0.09  | 0.27 | 0.41 | 11  |
| $N_d$                   | Strong                             | 249   | 133                | 45    | 169   | 216   | 335  | 774  | 90  |
|                         | Moderate, high $\Delta\theta_\ell$ | 256   | 140                | 45    | 114   | 330   | 349  | 440  | 9   |
|                         | Moderate, high $\Delta q_t$        | 290   | 118                | 25    | 211   | 287   | 384  | 450  | 12  |
|                         | Weak                               | 209   | 112                | 50    | 77    | 220   | 293  | 392  | 10  |
| MinAlt $\sigma_w$       | Strong                             | 0.51  | 0.24               | 0.00  | 0.33  | 0.51  | 0.66 | 1.2  | 118 |
|                         | Moderate, high $\Delta\theta_\ell$ | 0.43  | 0.36               | 0.00  | 0.15  | 0.36  | 0.67 | 1.2  | 12  |
|                         | Moderate, high $\Delta q_t$        | 0.61  | 0.25               | 0.30  | 0.40  | 0.59  | 0.74 | 1.2  | 18  |
|                         | Weak                               | 0.38  | 0.20               | 0.11  | 0.16  | 0.35  | 0.52 | 0.73 | 11  |
| BCB $\sigma_w$          | Strong                             | 0.58  | 0.68               | 0.00  | 0.22  | 0.41  | 0.69 | 4.0  | 118 |
|                         | Moderate, high $\Delta\theta_\ell$ | 0.47  | 0.36               | 0.00  | 0.22  | 0.37  | 0.76 | 1.1  | 12  |
|                         | Moderate, high $\Delta q_t$        | 0.76  | 0.81               | 0.00  | 0.26  | 0.45  | 0.97 | 3.3  | 18  |
|                         | Weak                               | 0.32  | 0.30               | 0.00  | 0.00  | 0.22  | 0.50 | 0.97 | 11  |
| BCB - MinAlt $\sigma_w$ | Strong                             | 0.08  | 0.73               | -1.2  | -0.26 | -0.10 | 0.19 | 3.6  | 116 |
|                         | Moderate, high $\Delta\theta_\ell$ | 0.02  | 0.43               | -0.83 | -0.25 | 0.08  | 0.32 | 0.59 | 10  |
|                         | Moderate, high $\Delta q_t$        | 0.15  | 0.81               | -0.64 | -0.26 | -0.09 | 0.20 | 0.00 | 18  |
|                         | Weak                               | -0.07 | 0.33               | -0.52 | -0.36 | 0.02  | 0.15 | 0.50 | 11  |

**Table S3.** Same as Table S2, except for winter flights only.

| Parameter                  | Degree of Coupling              | Mean  | Standard Deviation | Min  | 25%   | 50%   | 75%  | Max  | n   |
|----------------------------|---------------------------------|-------|--------------------|------|-------|-------|------|------|-----|
| $\Delta\text{scat}$        | Strong                          | 2.0   | 1.7                | 0.00 | 0.79  | 1.6   | 2.7  | 10.3 | 168 |
|                            | Moderate, high $\Delta\theta_t$ | 3.3   | 3.5                | 0.07 | 0.90  | 2.2   | 4.3  | 14.6 | 40  |
|                            | Moderate, high $\Delta q_t$     | 2.5   | 2.1                | 0.01 | 0.67  | 2.3   | 4.3  | 6.7  | 23  |
|                            | Weak                            | 3.1   | 2.8                | 0.54 | 0.89  | 1.6   | 6.5  | 7.1  | 9   |
| $\Delta\text{IntV}$        | Strong                          | 2.3   | 2.5                | 0.02 | 0.45  | 1.5   | 3.2  | 13.0 | 173 |
|                            | Moderate, high $\Delta\theta_t$ | 1.8   | 1.8                | 0.00 | 0.44  | 1.3   | 2.6  | 7.5  | 42  |
|                            | Moderate, high $\Delta q_t$     | 2.0   | 2.1                | 0.12 | 0.74  | 1.3   | 2.4  | 8.3  | 24  |
|                            | Weak                            | 2.9   | 2.7                | 0.30 | 0.84  | 2.3   | 5.0  | 7.6  | 9   |
| $\Delta N_{>3\mu\text{m}}$ | Strong                          | 0.22  | 0.52               | 0.00 | 0.04  | 0.09  | 0.19 | 4.9  | 173 |
|                            | Moderate, high $\Delta\theta_t$ | 0.30  | 0.69               | 0.00 | 0.03  | 0.10  | 0.23 | 3.6  | 42  |
|                            | Moderate, high $\Delta q_t$     | 0.11  | 0.08               | 0.00 | 0.10  | 0.10  | 0.13 | 0.35 | 24  |
|                            | Weak                            | 0.93  | 2.1                | 0.01 | 0.06  | 0.06  | 0.92 | 6.0  | 9   |
| $N_d$                      | Strong                          | 402   | 238                | 19   | 226   | 367   | 550  | 954  | 148 |
|                            | Moderate, high $\Delta\theta_t$ | 457   | 246                | 73   | 243   | 409   | 670  | 962  | 39  |
|                            | Moderate, high $\Delta q_t$     | 354   | 171                | 40   | 235   | 363   | 512  | 671  | 19  |
|                            | Weak                            | 358   | 222                | 81   | 116   | 419   | 560  | 606  | 8   |
| MinAlt $\sigma_w$          | Strong                          | 1.1   | 0.46               | 0.00 | 0.82  | 1.1   | 1.4  | 2.4  | 175 |
|                            | Moderate, high $\Delta\theta_t$ | 1.1   | 0.52               | 0.00 | 0.97  | 1.2   | 1.5  | 2.2  | 44  |
|                            | Moderate, high $\Delta q_t$     | 0.95  | 0.49               | 0.00 | 0.63  | 0.85  | 1.4  | 1.9  | 24  |
|                            | Weak                            | 0.75  | 0.46               | 0.00 | 0.32  | 0.95  | 1.0  | 1.3  | 9   |
| BCB $\sigma_w$             | Strong                          | 0.79  | 0.57               | 0.00 | 0.33  | 0.80  | 1.2  | 2.5  | 175 |
|                            | Moderate, high $\Delta\theta_t$ | 0.69  | 0.67               | 0.00 | 0.00  | 0.68  | 1.1  | 2.2  | 44  |
|                            | Moderate, high $\Delta q_t$     | 0.86  | 0.74               | 0.00 | 0.10  | 0.81  | 1.2  | 2.5  | 24  |
|                            | Weak                            | 0.71  | 0.63               | 0.00 | 0.10  | 0.86  | 1.4  | 1.6  | 9   |
| BCB -<br>MinAlt $\sigma_w$ | Strong                          | -0.30 | 0.57               | -2.0 | -0.58 | -0.23 | 0.10 | 1.1  | 169 |
|                            | Moderate, high $\Delta\theta_t$ | -0.42 | 0.57               | -2.2 | -0.88 | -0.29 | 0.00 | 0.53 | 43  |
|                            | Moderate, high $\Delta q_t$     | -0.09 | 0.68               | -1.6 | -0.57 | -0.05 | 0.24 | 1.6  | 24  |
|                            | Weak                            | -0.04 | 0.62               | -1.1 | -0.46 | 0.00  | 0.38 | 0.90 | 9   |

**Table S4.** Mean cloud water sample concentrations ( $\mu\text{g m}^{-3}$ ), pH, and Cl:Na<sup>+</sup> mass ratio. Each chemical species is broken down into the different degrees of coupling (n = number of points used in each coupling category; n<sub>pH</sub> = number of points used in pH analysis).

|                                   | Strong | Moderate,<br>high $\Delta\theta_\ell$ | Moderate,<br>high $\Delta q_t$ | Weak |
|-----------------------------------|--------|---------------------------------------|--------------------------------|------|
| Cl <sup>-</sup>                   | 45.6   | 32.0                                  | 52.2                           | 4.1  |
| Na <sup>+</sup>                   | 27.9   | 18.6                                  | 29.9                           | 2.5  |
| Mg <sup>2+</sup>                  | 3.3    | 2.2                                   | 3.6                            | 0.35 |
| K <sup>+</sup>                    | 0.56   | 0.37                                  | 0.59                           | 0.05 |
| nss-Ca <sup>2+</sup>              | 0.53   | 0.18                                  | 0.17                           | 0.03 |
| nss-SO <sub>4</sub> <sup>2-</sup> | 2.6    | 1.5                                   | 1.7                            | 1.2  |
| NO <sub>3</sub> <sup>-</sup>      | 6.0    | 2.7                                   | 3.3                            | 1.5  |
| Oxalate                           | 0.10   | 0.01                                  | 0.03                           | 0.01 |
| NH <sub>4</sub> <sup>+</sup>      | 0.89   | 0.37                                  | 0.33                           | 0.56 |
| pH                                | 4.9    | 4.6                                   | 5.3                            | 4.4  |
| Cl:Na <sup>+</sup>                | 1.7    | 1.7                                   | 1.7                            | 1.5  |
| n                                 | 40     | 17                                    | 4                              | 6    |
| n <sub>pH</sub>                   | 16     | 11                                    | 3                              | 2    |

**Table S5.** Mean cloud water sample concentrations ( $\mu\text{g m}^{-3}$ ), pH, and Cl<sup>-</sup>:Na<sup>+</sup> mass ratio during the summer flights. Each chemical species is broken down into two different degrees of coupling (strong and ‘moderate, high  $\Delta\theta_t$ ’), since there were not any samples that fit the criteria for the other two degrees of coupling (‘moderate, high  $\Delta q_t$ ’ and weak). (n = number of points used in each coupling category; n<sub>pH</sub> = number of points used in pH analysis)

|                                   | Strong | Moderate,<br>high $\Delta\theta_t$ |
|-----------------------------------|--------|------------------------------------|
| Cl <sup>-</sup>                   | 39.3   | 4.6                                |
| Na <sup>+</sup>                   | 24.0   | 2.7                                |
| Mg <sup>2+</sup>                  | 2.5    | 0.35                               |
| K <sup>+</sup>                    | 0.50   | 0.06                               |
| nss-Ca <sup>2+</sup>              | 0.65   | 0.10                               |
| nss-SO <sub>4</sub> <sup>2-</sup> | 4.0    | 0.22                               |
| NO <sub>3</sub> <sup>-</sup>      | 9.1    | 0.58                               |
| Oxalate                           | 0.27   | 0.00                               |
| NH <sub>4</sub> <sup>+</sup>      | 2.0    | 0.03                               |
| pH                                | 5.2    | 5.4                                |
| Cl <sup>-</sup> :Na <sup>+</sup>  | 1.6    | 1.7                                |
| n                                 | 10     | 1                                  |
| n <sub>pH</sub>                   | 4      | 1                                  |

**Table S6.** Mean cloud water sample concentrations ( $\mu\text{g m}^{-3}$ ), pH, and Cl<sup>-</sup>:Na<sup>+</sup> mass ratio during the winter flights. Each chemical species is broken down into the different degrees of coupling (n = number of points used in each coupling category; n<sub>pH</sub> = number of points used in pH analysis).

|                                   | Strong | Moderate,<br>high $\Delta\theta_\ell$ | Moderate,<br>high $\Delta q_t$ | Weak |
|-----------------------------------|--------|---------------------------------------|--------------------------------|------|
| Cl <sup>-</sup>                   | 47.7   | 33.7                                  | 52.2                           | 4.1  |
| Na <sup>+</sup>                   | 29.2   | 19.6                                  | 29.9                           | 2.5  |
| Mg <sup>2+</sup>                  | 3.6    | 2.3                                   | 3.6                            | 0.35 |
| K <sup>+</sup>                    | 0.58   | 0.39                                  | 0.59                           | 0.05 |
| nss-Ca <sup>2+</sup>              | 0.49   | 0.19                                  | 0.17                           | 0.03 |
| nss-SO <sub>4</sub> <sup>2-</sup> | 2.1    | 1.6                                   | 1.7                            | 1.2  |
| NO <sub>3</sub> <sup>-</sup>      | 5.0    | 2.8                                   | 3.3                            | 1.5  |
| Oxalate                           | 0.05   | 0.01                                  | 0.03                           | 0.01 |
| NH <sub>4</sub> <sup>+</sup>      | 0.57   | 0.39                                  | 0.33                           | 0.56 |
| pH                                | 4.8    | 4.5                                   | 5.3                            | 4.4  |
| Cl <sup>-</sup> :Na <sup>+</sup>  | 1.7    | 1.7                                   | 1.7                            | 1.5  |
| n                                 | 30     | 16                                    | 4                              | 6    |
| n <sub>pH</sub>                   | 12     | 10                                    | 3                              | 2    |



**Table S7.** Results of Welch's t-tests for nine different chemical species, pH, and Cl<sup>-</sup>:Na<sup>+</sup> comparing species concentrations within different degrees of coupling. Bolded values indicate statistical significance ( $\alpha < 0.05$ ). Refer to Tables S4-S6 (also Table 4) for the number of points within each coupling category.

Cl<sup>-</sup>

|                                 | Strong                    | Moderate, high $\Delta\theta_t$ | Moderate, high $\Delta q_t$ |
|---------------------------------|---------------------------|---------------------------------|-----------------------------|
| Moderate, high $\Delta\theta_t$ | 0.36                      |                                 |                             |
| Moderate, high $\Delta q_t$     | 0.57                      | 0.35                            |                             |
| Weak                            | <b>3.54E<sup>-5</sup></b> | <b>0.01</b>                     | 0.15                        |

Na<sup>+</sup>

|                                 | Strong                    | Moderate, high $\Delta\theta_t$ | Moderate, high $\Delta q_t$ |
|---------------------------------|---------------------------|---------------------------------|-----------------------------|
| Moderate, high $\Delta\theta_t$ | 0.30                      |                                 |                             |
| Moderate, high $\Delta q_t$     | 0.61                      | 0.34                            |                             |
| Weak                            | <b>1.07E<sup>-4</sup></b> | <b>0.01</b>                     | 0.14                        |

Mg<sup>2+</sup>

|                                 | Strong                    | Moderate, high $\Delta\theta_t$ | Moderate, high $\Delta q_t$ |
|---------------------------------|---------------------------|---------------------------------|-----------------------------|
| Moderate, high $\Delta\theta_t$ | 0.24                      |                                 |                             |
| Moderate, high $\Delta q_t$     | 0.88                      | 0.45                            |                             |
| Weak                            | <b>6.41E<sup>-5</sup></b> | <b>0.01</b>                     | 0.12                        |

K<sup>+</sup>

|                                 | Strong                    | Moderate, high $\Delta\theta_t$ | Moderate, high $\Delta q_t$ |
|---------------------------------|---------------------------|---------------------------------|-----------------------------|
| Moderate, high $\Delta\theta_t$ | 0.27                      |                                 |                             |
| Moderate, high $\Delta q_t$     | 0.61                      | 0.34                            |                             |
| Weak                            | <b>5.52E<sup>-5</sup></b> | <b>0.01</b>                     | 0.15                        |

nss-Ca<sup>2+</sup>

|                                 | Strong                    | Moderate, high $\Delta\theta_t$ | Moderate, high $\Delta q_t$ |
|---------------------------------|---------------------------|---------------------------------|-----------------------------|
| Moderate, high $\Delta\theta_t$ | 0.06                      |                                 |                             |
| Moderate, high $\Delta q_t$     | 0.06                      | 0.94                            |                             |
| Weak                            | <b>1.30E<sup>-3</sup></b> | 0.21                            | 0.31                        |

nss-SO<sub>4</sub><sup>2-</sup>

|                                 | Strong | Moderate, high $\Delta\theta_t$ | Moderate, high $\Delta q_t$ |
|---------------------------------|--------|---------------------------------|-----------------------------|
| Moderate, high $\Delta\theta_t$ | 0.21   |                                 |                             |
| Moderate, high $\Delta q_t$     | 0.74   | 0.64                            |                             |
| Weak                            | 0.25   | 0.78                            | 0.54                        |

NO<sub>3</sub><sup>-</sup>

|                                 | Strong                    | Moderate, high $\Delta\theta_t$ | Moderate, high $\Delta q_t$ |
|---------------------------------|---------------------------|---------------------------------|-----------------------------|
| Moderate, high $\Delta\theta_t$ | 0.07                      |                                 |                             |
| Moderate, high $\Delta q_t$     | 0.46                      | 0.65                            |                             |
| Weak                            | <b>9.57E<sup>-3</sup></b> | 0.37                            | 0.36                        |

Oxalate

|                                 | Strong | Moderate, high $\Delta\theta_t$ | Moderate, high $\Delta q_t$ |
|---------------------------------|--------|---------------------------------|-----------------------------|
| Moderate, high $\Delta\theta_t$ | 0.14   |                                 |                             |
| Moderate, high $\Delta q_t$     | 0.35   | 0.50                            |                             |
| Weak                            | 0.18   | 0.71                            | 0.61                        |

NH<sub>4</sub><sup>+</sup>

|                                    | Strong | Moderate,<br>high $\Delta\theta_t$ | Moderate,<br>high $\Delta q_t$ |
|------------------------------------|--------|------------------------------------|--------------------------------|
| Moderate,<br>high $\Delta\theta_t$ | 0.09   |                                    |                                |
| Moderate,<br>high $\Delta q_t$     | 0.07   | 0.84                               |                                |
| Weak                               | 0.47   | 0.63                               | 0.56                           |

pH

|                                    | Strong | Moderate,<br>high $\Delta\theta_t$ | Moderate,<br>high $\Delta q_t$ |
|------------------------------------|--------|------------------------------------|--------------------------------|
| Moderate,<br>high $\Delta\theta_t$ | 0.08   |                                    |                                |
| Moderate,<br>high $\Delta q_t$     | 0.96   | 0.62                               |                                |
| Weak                               | 0.16   | 0.75                               | 0.58                           |

Cl<sup>-</sup>:Na<sup>+</sup>

|                                    | Strong | Moderate,<br>high $\Delta\theta_t$ | Moderate,<br>high $\Delta q_t$ |
|------------------------------------|--------|------------------------------------|--------------------------------|
| Moderate,<br>high $\Delta\theta_t$ | 0.79   |                                    |                                |
| Moderate,<br>high $\Delta q_t$     | 0.49   | 0.43                               |                                |
| Weak                               | 0.30   | 0.34                               | 0.22                           |

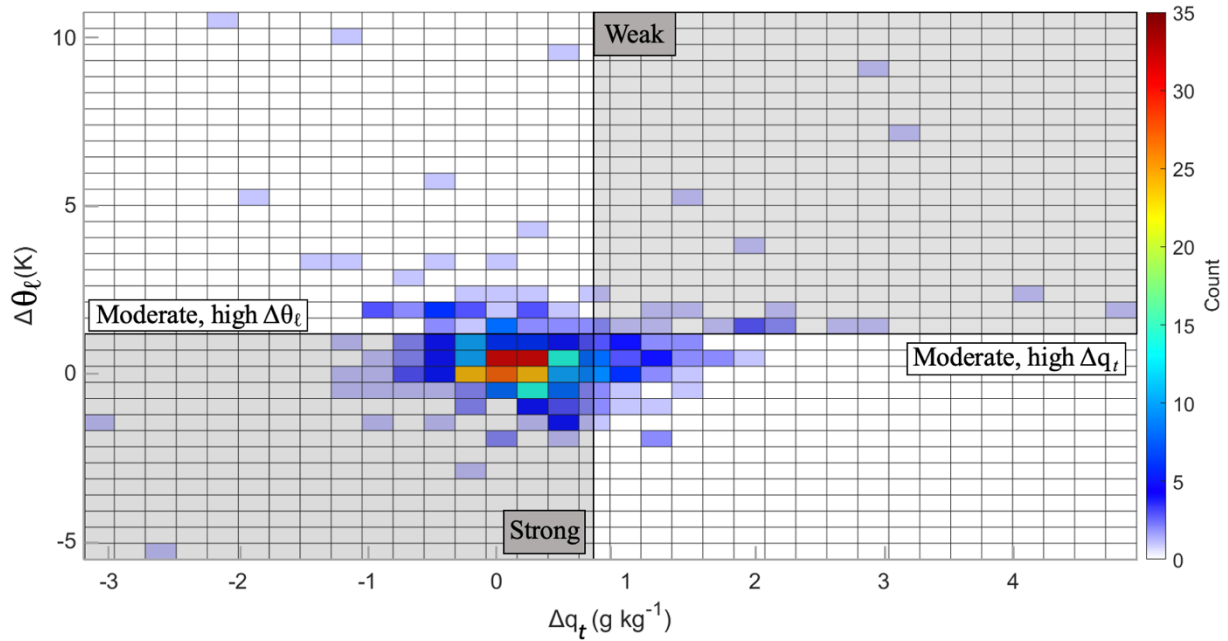

**Figure S1.** Joint frequency histogram of  $\Delta\theta_\ell$  versus  $\Delta q_t$  for MinAlt-BCB pairs, categorized into four coupling regimes. There is a total of 411 pairs plotted (strong coupling = 293, moderate coupling with high  $\Delta\theta_\ell$  = 56, moderate coupling with high  $\Delta q_t$  = 42, weak coupling = 20). Figure 4 shows this information visually also but breaks down the MinAlt-BCB pairs into seasons.

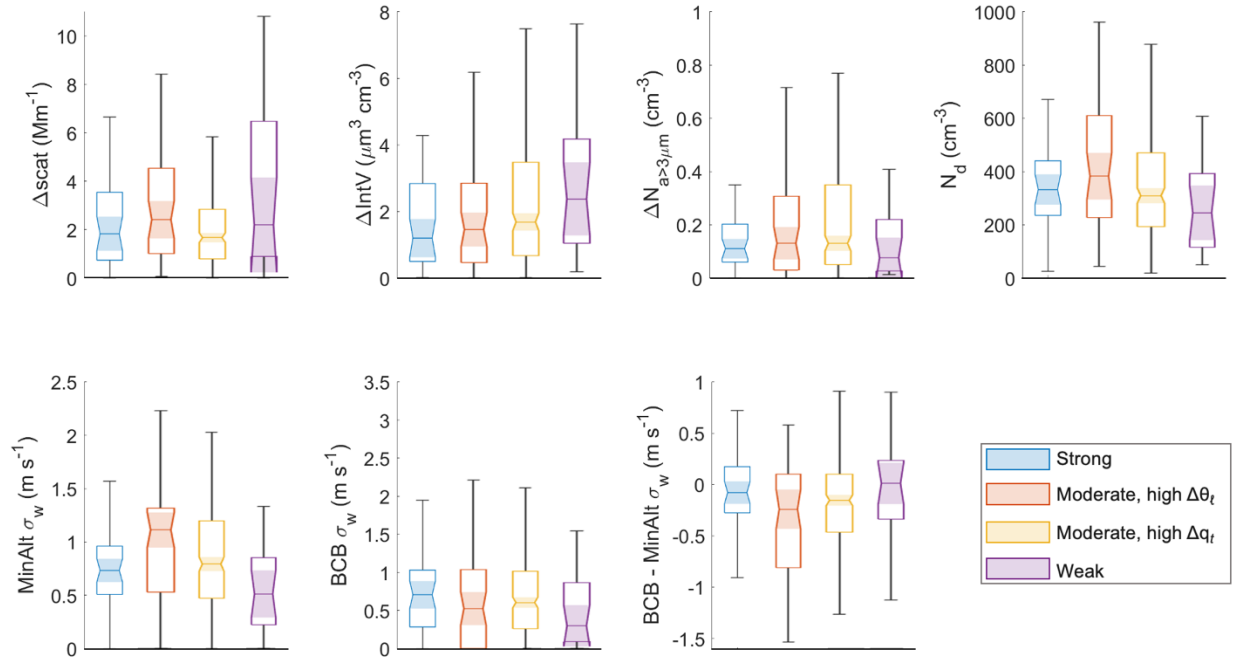

**Figure S2.** Notched box plots of various atmospheric properties investigated across MinAlt-BCB pairs. Refer to Table 3 for additional statistics and total number of points. The notches of the boxes assist in the determination of statistical significance between multiple medians (the shading indicates where the notches begin and end). If notches/shading do not overlap, the medians are statistically different from one another (also referred to as statistically significant).
